# Supplementary material for: Dynamically cultured, differentiated bovine adipose-derived stem cell spheroids as building blocks for biofabricating cultured fat
Source: PubMed Central journal article supplement (PMC11496621; doi:10.1038/s41467-024-53486-w), 2024-10-22
Supplement: 41467_2024_53486_MOESM1_ESM.pdf [file 41467_2024_53486_MOESM1_ESM.pdf]

## Supplementary Information

**Supplementary Table 1: Cell yield per body region.** Cell yield when cells are extracted from fat from the chest, thighs, abdomen and back of 2-year-old Limousin cattle.

| Isolated cells per gram fat |            |            |            |
|-----------------------------|------------|------------|------------|
| Chest                       | Thigh      | Abdomen    | Back       |
| 122914.457                  | 282131.661 | 161312.849 | 364552.656 |
| 468579.731                  | 452378.742 | 277560.157 | 132859.829 |
| 277777.778                  | 366550.377 | 52086.4878 | 166020.672 |
| 51785.5942                  | 122699.313 |            | 387595.881 |
| 709731.078                  | 186477.224 |            | 31090.1394 |
| 262579.653                  | 314354.747 |            | 306231.779 |
| 284251.685                  | 134121.871 |            |            |
| 599552.334                  | 182861.241 |            |            |
| 734146.829                  | 221801.138 |            |            |
| mean                        | mean       | mean       | mean       |
| 390146.571                  | 251486.257 | 163653.165 | 231391.826 |
| SD                          | SD         | SD         | SD         |
| 249120.431                  | 111055.38  | 112755.052 | 142713.167 |

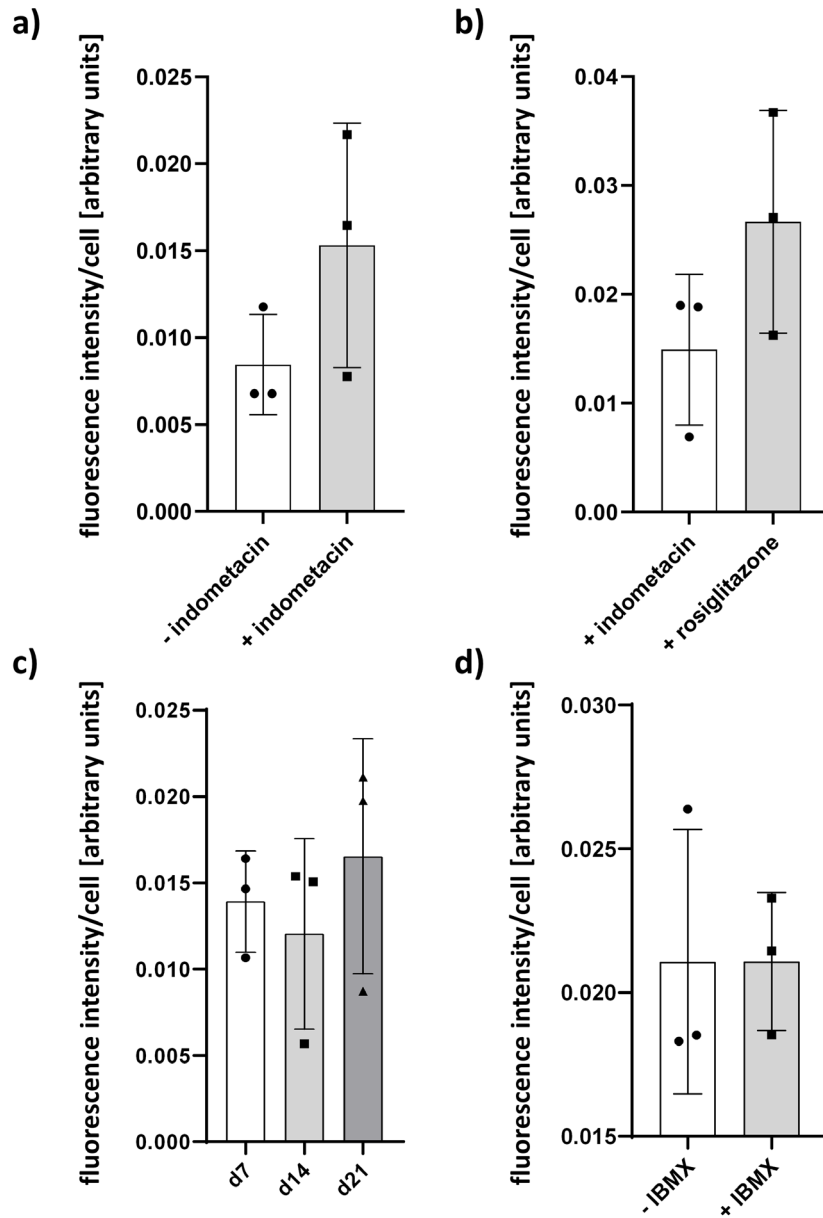

**Supplementary Figure 1: Quantification of lipid accumulation in differentiated bASCs.** **a:** Day 14 of 2D bASC differentiation with and without indomethacin and quantification of fluorescence signal/cell after BODIPY staining. DMEM-Diff - rosiglitazone + 3-Isobutyl-1-methylxanthin (IBMX); **b:** Day 14 of 2D bASC differentiation indomethacin vs rosiglitazone and quantification of fluorescence signal/cell after BODIPY staining. DMEM-Diff + IBMX; **c:** 2D bASC differentiation over time until day 21 and quantification of fluorescence signal/cell after BODIPY staining. DMEM-Diff + IBMX; **d:** Day 14 of 2D bASC differentiation with and without IBMX present in DMEM-Diff and quantification of fluorescence signal/cell after BODIPY staining; dots represent single data points; n=3 biological replicates. Data are plotted as mean and  $\pm$  SD. Source data are provided as a Source Data file.

### a) Spheroid formation of primary bASC

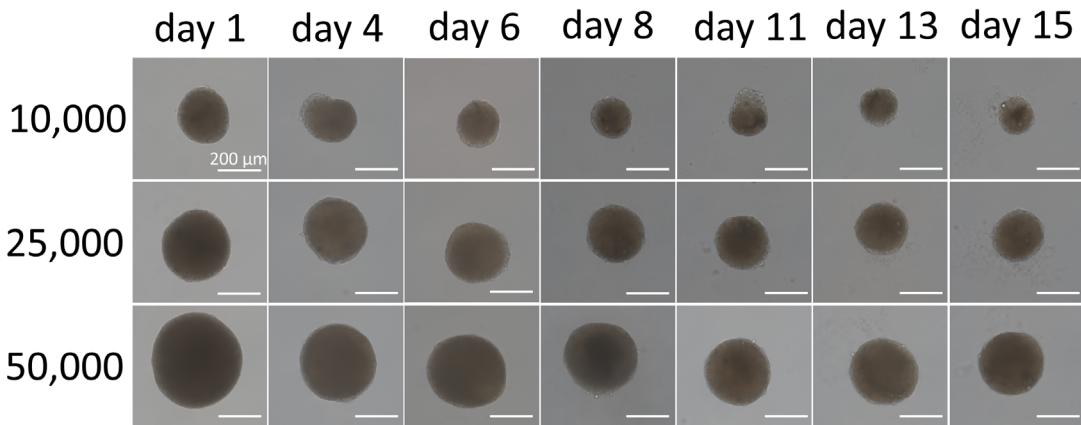

### b) Spheroid volume

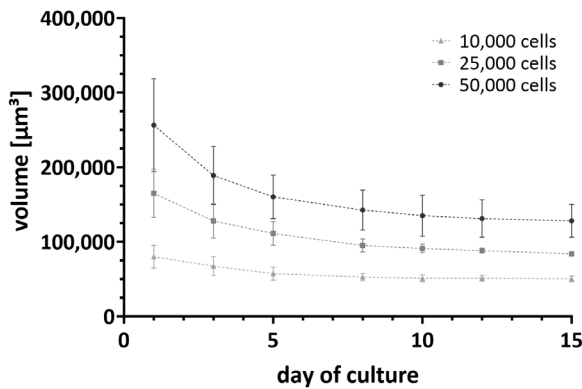

### c) Critical size evaluation

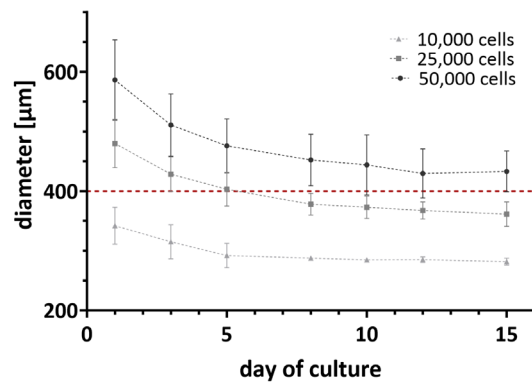

### d) Quantification of static 50k spheroid differentiation

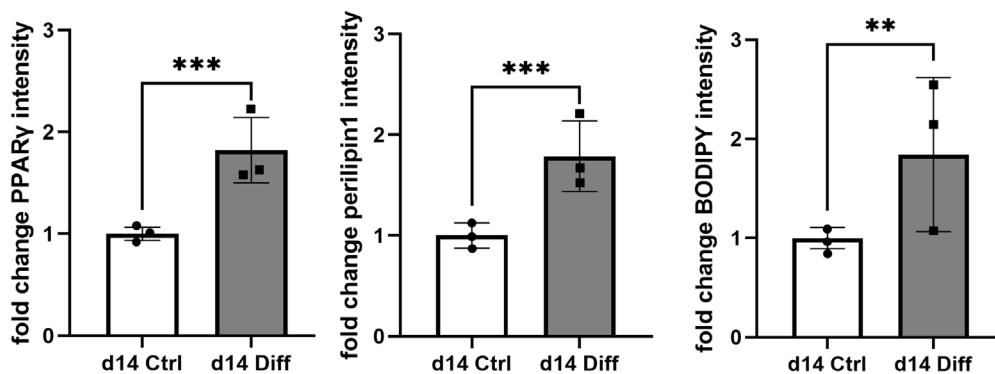

**Supplementary Figure 2: Characteristics of bASC spheroids.** **a:** Light microscopic images of 10,000, 25,000, and 50,000 cells per spheroid over 15 days. Scale bar: 200  $\mu\text{m}$ ; **b:** Determined spheroid volume over 15 days of maintenance.; **c:** Evaluation of the critical size limited by oxygen diffusion limit (marked red line);  $n=3$ ; **d:** Quantified marker intensities of PPAR $\gamma$  ( $p<0.001$ ), perilipin1 ( $p<0.001$ ) and BODIPY ( $p=0.005$ ) signals normed to day 14 control of 50k spheroids; Significances were calculated using Welch's t test; \*:  $p \leq 0.05$ , \*\*:  $p \leq 0.01$ , \*\*\*  $p \leq 0.001$ ;  $n=3$  biological replicates. Data are plotted as mean and  $\pm$  SD. Source data are provided as a Source Data file.

### a) Quantification of dynamic spheroid differentiation

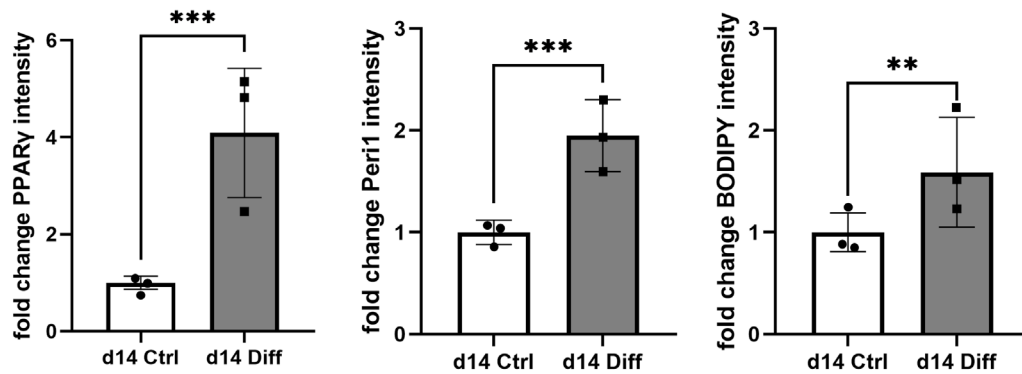

### b) Zoom on printed grid

w/o spheroids

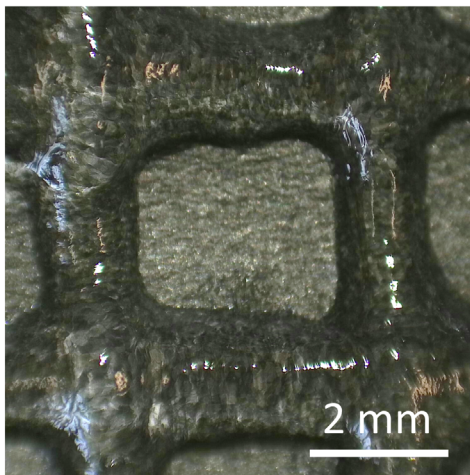

w/ spheroids

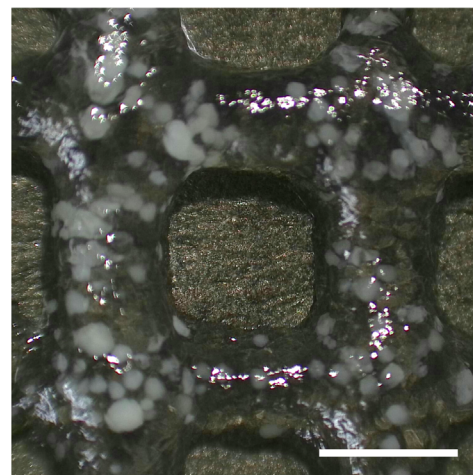

**Supplementary Figure 3: Quantification and printing of dynamic spheroids.** a: Quantification of marker intensity for dynamic spheroid staining. Marker intensities of PPAR $\gamma$  ( $p < 0.001$ ) perilipin1 ( $p < 0.001$ ) and BODIPY ( $p = 0.002$ ) signals normed to day 14 control; Significances were calculated using Welch's t test; \*:  $p \leq 0.05$ , \*\*:  $p \leq 0.01$ , \*\*\*  $p \leq 0.001$ ;  $n = 3$  biological replicates. Data are plotted as mean and  $\pm$  SD b: Zoom on printed grids of 1.5 % GG without (w/o) or with (w/) differentiated spheroids. Scale bar: 2 mm. Source data are provided as a Source Data file.

**Supplementary Table 2: Composition of fatty acids in native bovine fat tissue, differentiated spheroids and control spheroids.** Values for saturated (SFA), monounsaturated (MUFA) and polyunsaturated (PUFA) fatty acids in percent of all fatty acids.  $n = 3$  biological replicates.

| In % of total fat | Fat tissue |       |       | Differentiated spheroids |       |       | Control spheroids |       |       |
|-------------------|------------|-------|-------|--------------------------|-------|-------|-------------------|-------|-------|
|                   |            |       |       |                          |       |       |                   |       |       |
| SFA               | 77         | 88.45 | 81    | 61.6                     | 60.8  | 76.15 | 81.8              | 81.55 | 88.25 |
| MUFA              | 21.55      | 10.1  | 17.75 | 33.85                    | 34.15 | 13.8  | 6.15              | 5.9   | 5.4   |
| PUFA              | 1.25       | 1.15  | 1.1   | 3.8                      | 4.4   | 9.35  | 11.5              | 11.75 | 5.9   |
